# Supplementary material for: Three multi-responsive luminescent Zn-CPs for the detection of antibiotics/cations/anions in aqueous media
Source: Royal Society of Chemistry journal article supplement (doi:10.1039/d2ce01507b), 2022-12-09
Supplement: d2ce01507b1.pdf [file d2ce01507b1.pdf]

## Supporting Information for

# Three Multi-responsive Luminescent Zn-CPs for Detection of Antibiotics/Cations/Anions in Aqueous Media

Chuanbin Fan,<sup>a,b</sup> Guimei Huang,<sup>a,c</sup> Zhiyong Xing,<sup>a,b</sup> Junli Wang,<sup>a,b</sup> Yaqin Pang,<sup>a,b</sup> Qingping Huang,<sup>a,b</sup> Shifu Huang,<sup>a,b</sup> Ziao Zong,<sup>a,b,\*</sup> Feng Guo,<sup>a,b,\*\*</sup>

- a. School of Laboratory Medicine, Youjiang Medical University for Nationalities, Baise, Guangxi, 533000, P.R. China
- b. Industrial College of Biomedicine and Health Industry, Youjiang Medical University for Nationalities, Baise, Guangxi, 533000, P.R. China
- c. School of Chemistry and Pharmaceutical Sciences, Guangxi Normal University, Guilin 541004, People's Republic of China

\*Corresponding author: zongziao@126.com.

\*\*Corresponding author: guofeng1510@yeah.net.

## Materials and General Characteristics

The used materials of this work were of AR grade and purchased from commercial sources without further purification. The experimental powder X-ray diffraction (PXRD) of YMUN 6–8 samples were collected on a Rigaku Miniflex 600 instrument. A Nicolet 170SX spectrometer was employed to record the infrared (IR) spectra with KBr pellets, and the measurements were in the range of 4000–400  $\text{cm}^{-1}$ . We used the Perkin-Elmer TG-7 thermogravimetric analyzer to conduct thermogravimetric analysis (TGA) under nitrogen condition, and the heating rate was 10  $^{\circ}\text{C min}^{-1}$  from 30 to 800  $^{\circ}\text{C}$ . A Shimadzu UV-2550 spectrophotometer was used to obtain the UV–vis spectra. Luminescence spectra were collected on a Perkin Elmer LS55 spectrophotometer.

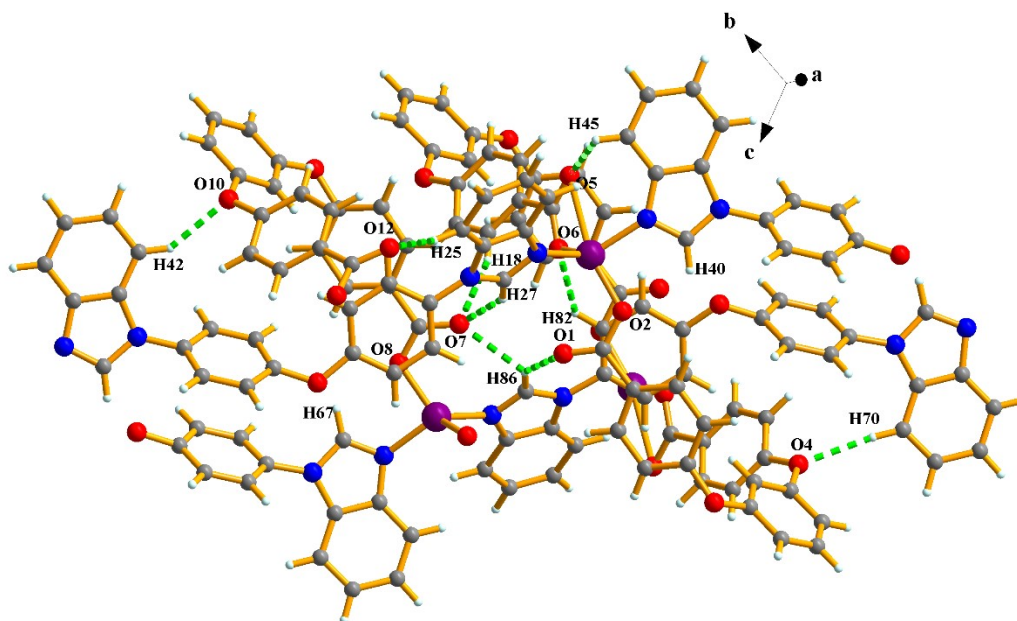

**Figure S1.** View of the noncovalent supramolecular interactions in YMUN 6. The weak interactions in the neighboring A and B segments by C-H $\cdots$ O hydrogen bonding interactions (the distance of C-H $\cdots$ O and the angle of  $\angle$ C-H $\cdots$ O are listed in Table S2).

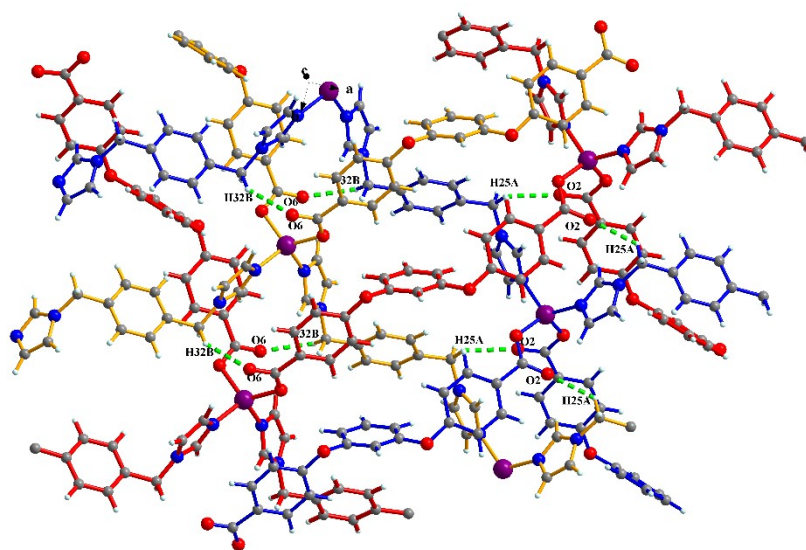

**Figure S2.** View of the noncovalent supramolecular interactions in YMUN 7. The neighboring 2D three-fold interpenetrated structures are interlined by C-H $\cdots$ O hydrogen-bonding interactions (the distance of C-H $\cdots$ O and the angle of  $\angle$ C-H $\cdots$ O are listed in Table S2).

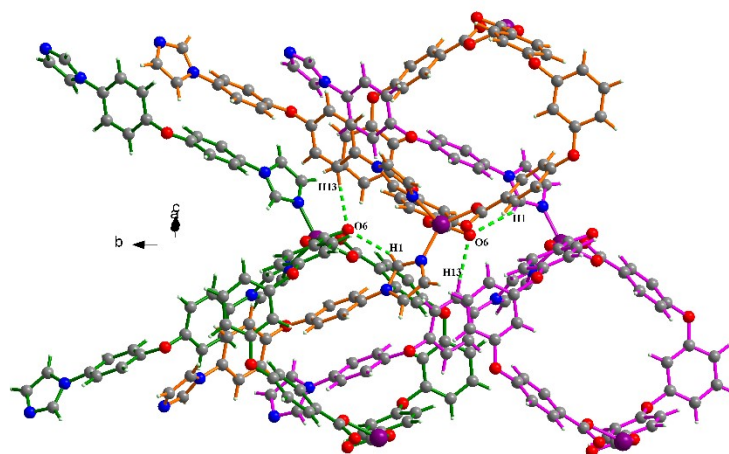

**Figure S3.** View of the noncovalent supramolecular interactions in YMUN **8**. The neighboring 2D three-fold interpenetrated structures are interlined by C-H $\cdots$ O hydrogen-bonding interactions (the distance of C-H $\cdots$ O and the angle of  $\angle$ C-H $\cdots$ O are listed in Table S2).

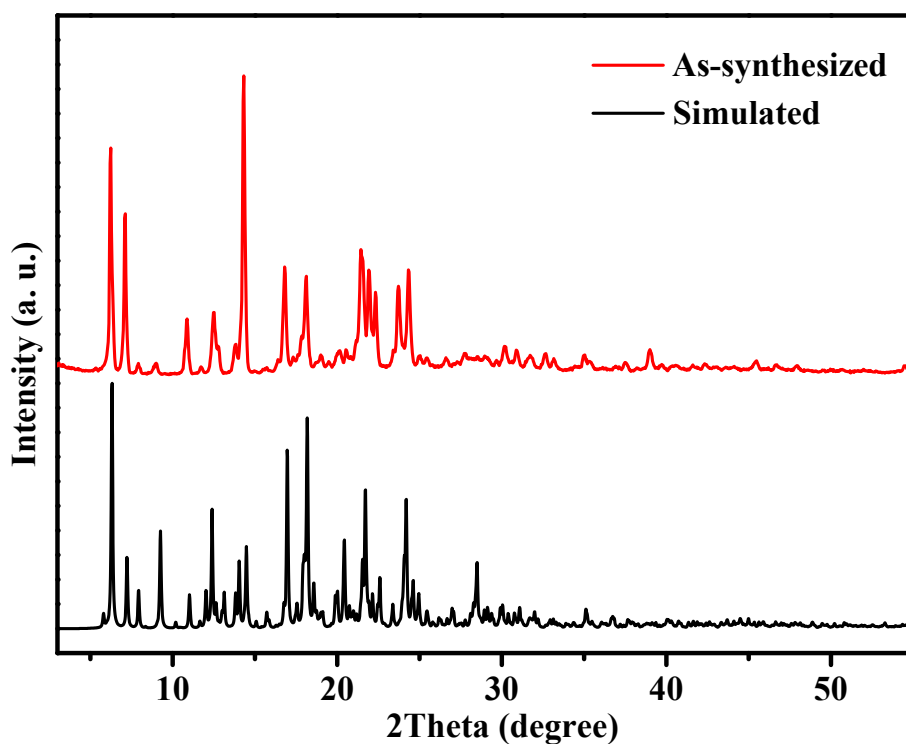

**Figure S4.** PXRD patterns of YMUN **6**, simulated and as-synthesized.

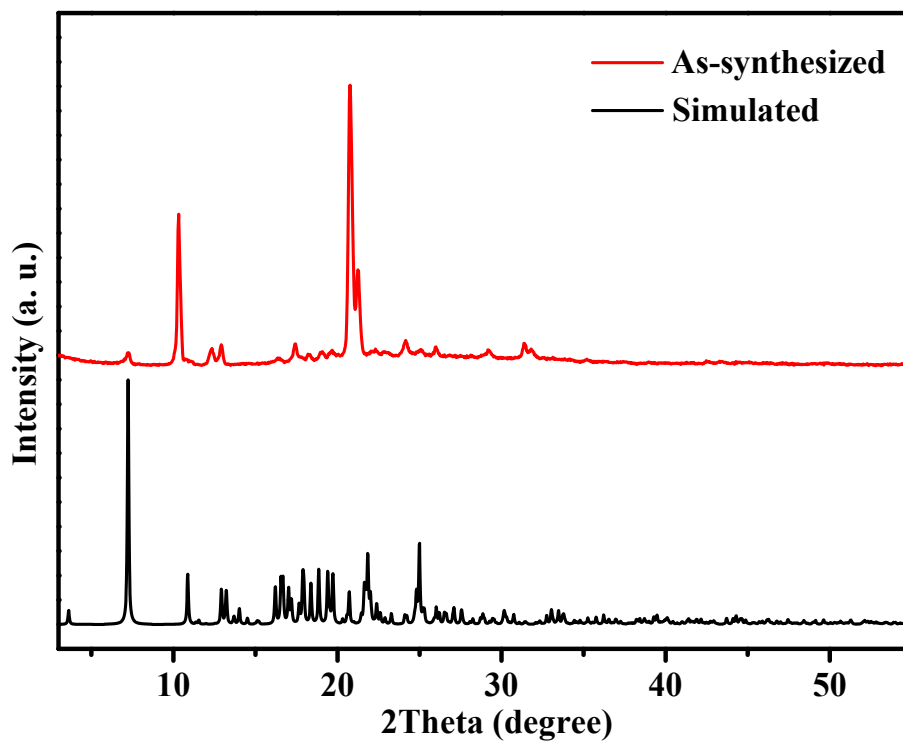

**Figure S5.** PXRd patterns of YMUN 7, simulated and as-synthesized.

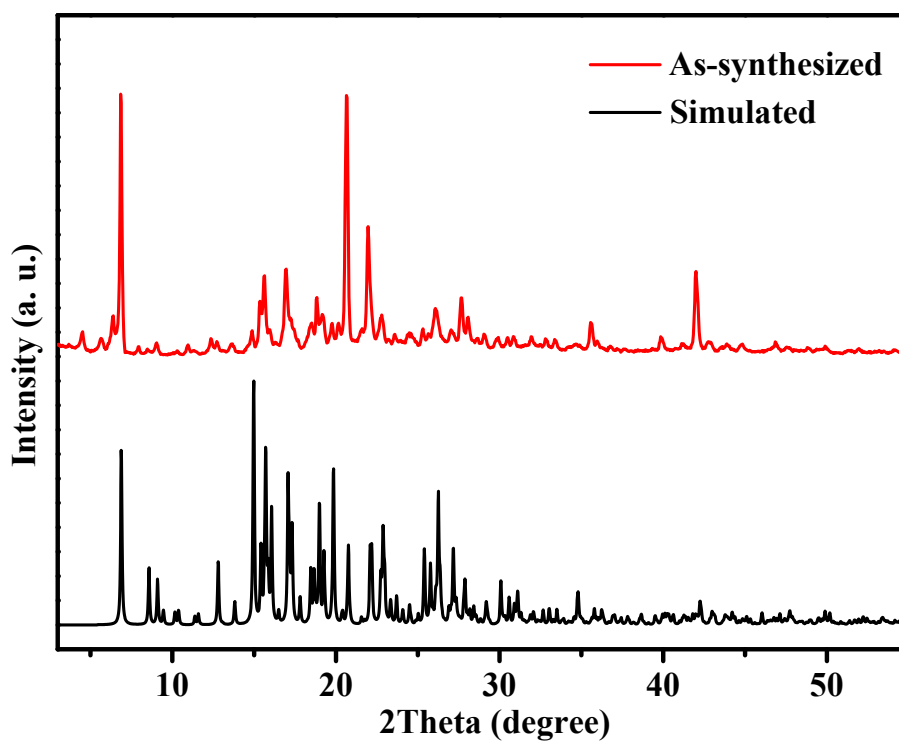

**Figure S6.** PXRd patterns of YMUN 8, simulated and as-synthesized.

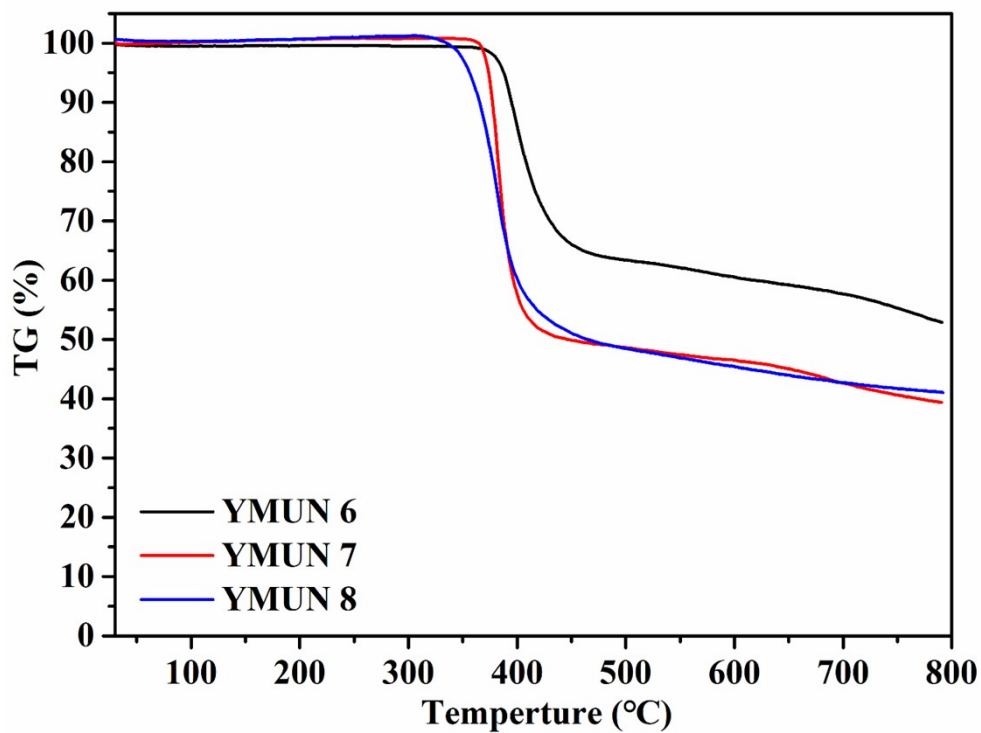

**Figure S7.** The TG curves of YMUN 6–8

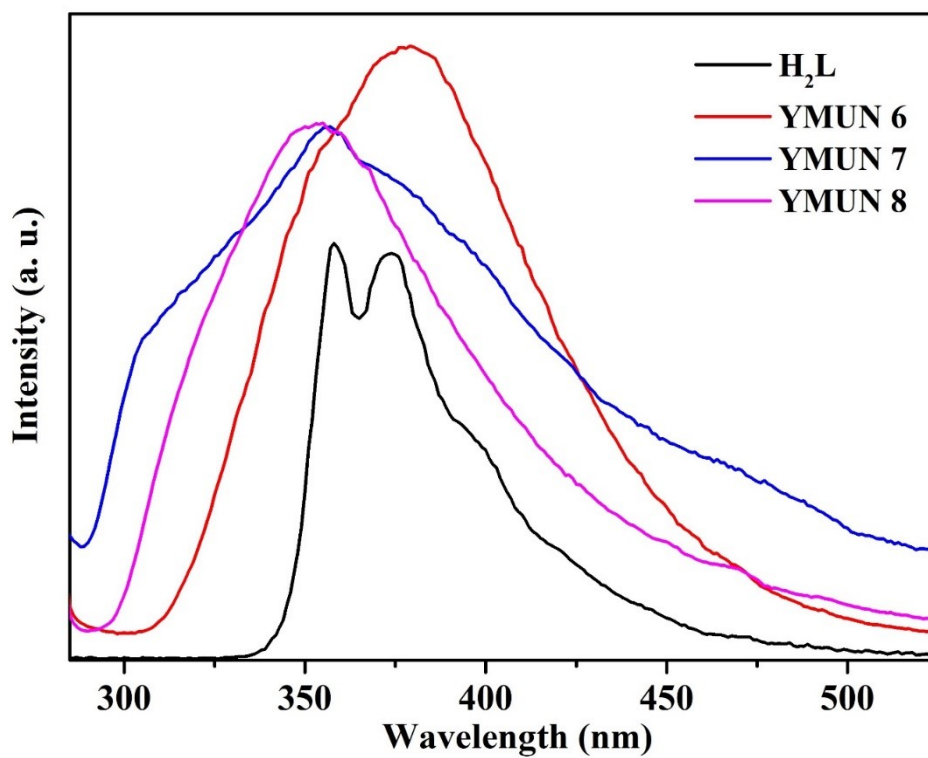

**Figure S8.** Photoluminescence of H<sub>2</sub>L ligand and YMUN 6–8 at room temperature in the solid state.

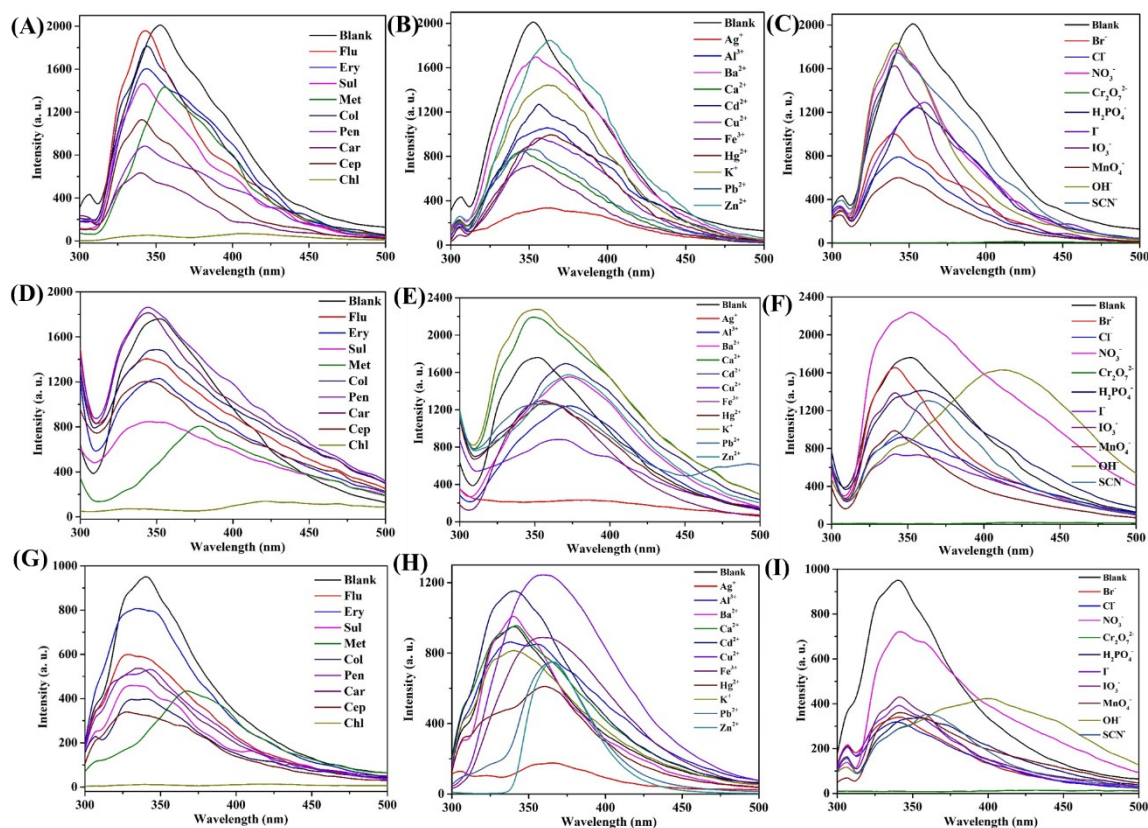

**Figure S9.** (A)-(C) Fluorescence spectra of **YMUN 6** powder and **YMUN 6** powder introduced into different antibiotics (0.5 mM), metal ions (1.0 mM), and cations (1.0 mM) in the aqueous solution at room temperature ( $\lambda_{\text{ex}} = 275$  nm). (E)-(G) Fluorescence spectra of **YMUN 7** powder and **YMUN 7** powder introduced into different antibiotics (0.5 mM), metal ions (1.0 mM), and cations (1.0 mM) in the aqueous solution at room temperature ( $\lambda_{\text{ex}} = 271$  nm). (G)-(I) Fluorescence spectra of **YMUN 8** powder and **YMUN 8** powder introduced into different antibiotics (0.5 mM), metal ions (1.0 mM), and cations (1.0 mM) in the aqueous solution at room temperature ( $\lambda_{\text{ex}} = 275$  nm).

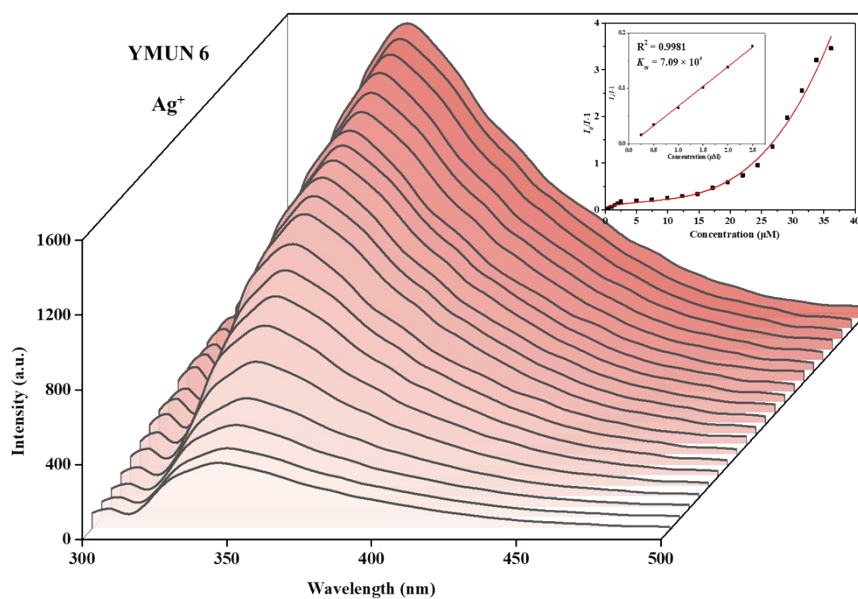

**Figure S10.** The fluorescence intensity trend spectra and the  $S-V$  linear relationship curve of YMUN 6 after adding  $\text{Ag}^+$  solution.

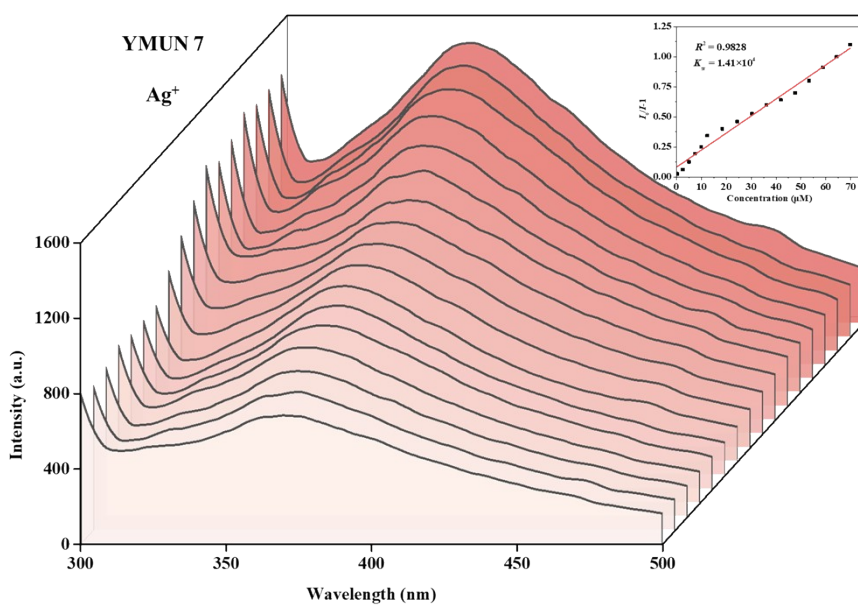

**Figure S11.** The fluorescence intensity trend spectra and the  $S-V$  linear relationship curve of YMUN 7 after adding  $\text{Ag}^+$  solution.

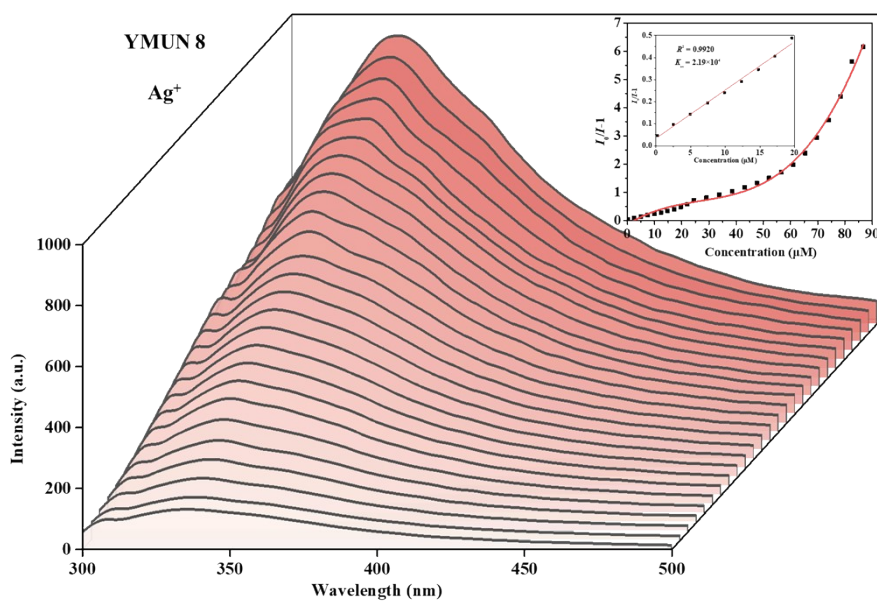

**Figure S12.** The fluorescence intensity trend spectra and the  $S-V$  linear relationship curve of YMUN 8 after adding  $\text{Ag}^+$  solution.

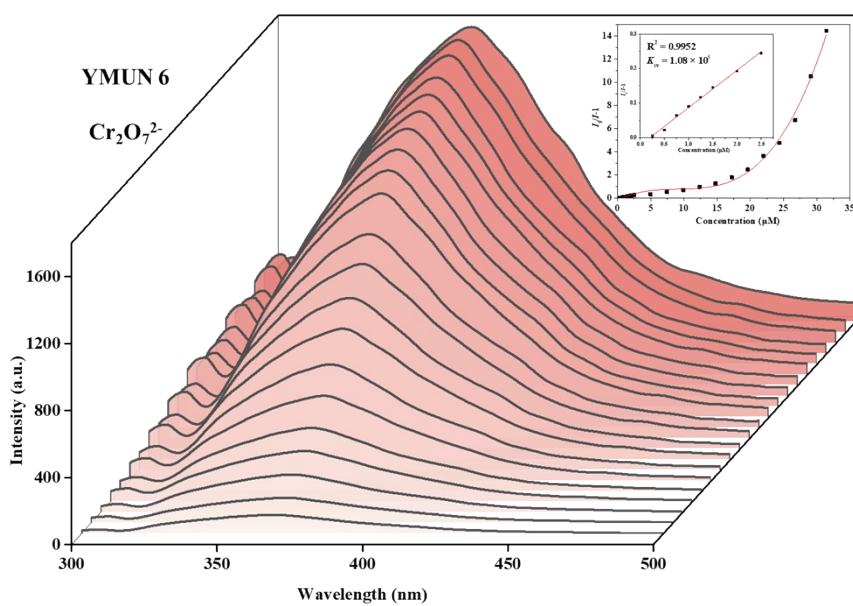

**Figure S13.** The fluorescence intensity trend spectra and the  $S-V$  linear relationship curve of YMUN 6 after adding  $\text{Cr}_2\text{O}_7^{2-}$  solution.



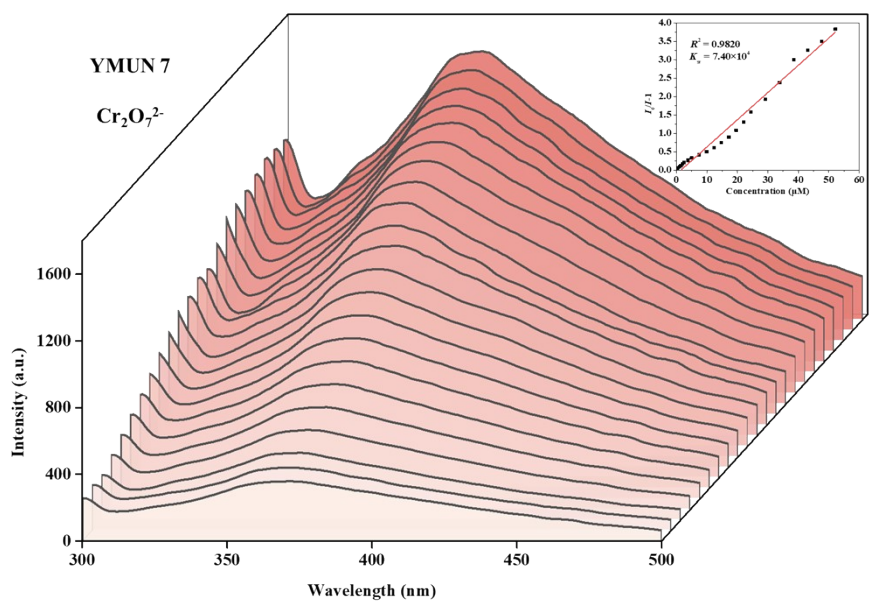

**Figure S14.** The fluorescence intensity trend spectra and the  $S-V$  linear relationship curve of YMUN 7 after adding  $\text{Cr}_2\text{O}_7^{2-}$  solution.

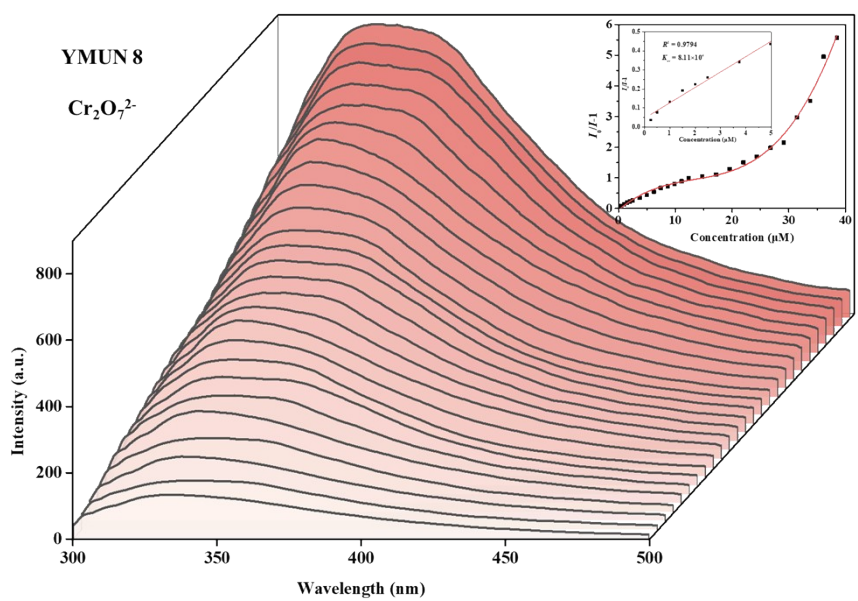

**Figure S15.** The fluorescence intensity trend spectra and the  $S-V$  linear relationship curve of YMUN 8 after adding  $\text{Cr}_2\text{O}_7^{2-}$  solution.

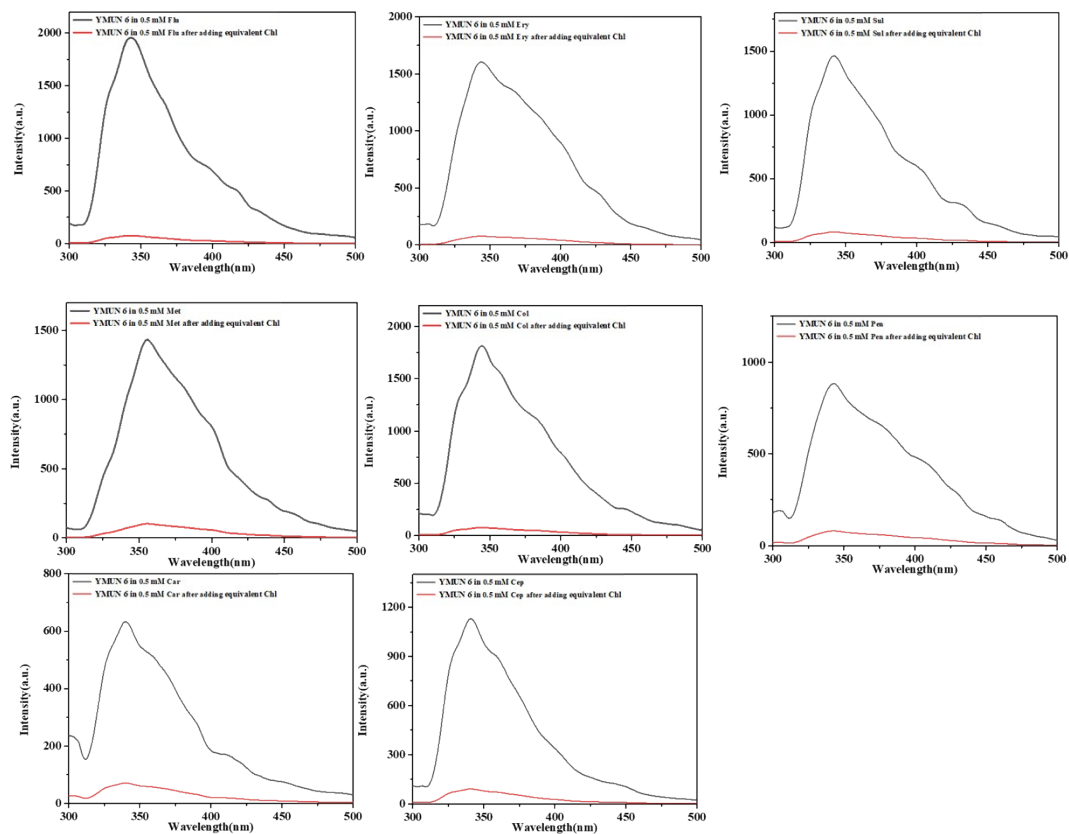

**Figure S16.** The fluorescence spectra of **YMUN 6** in various antibiotics (0.5 mM) (Black lines), and adding equivalent **Chl** in various antibiotics solution.

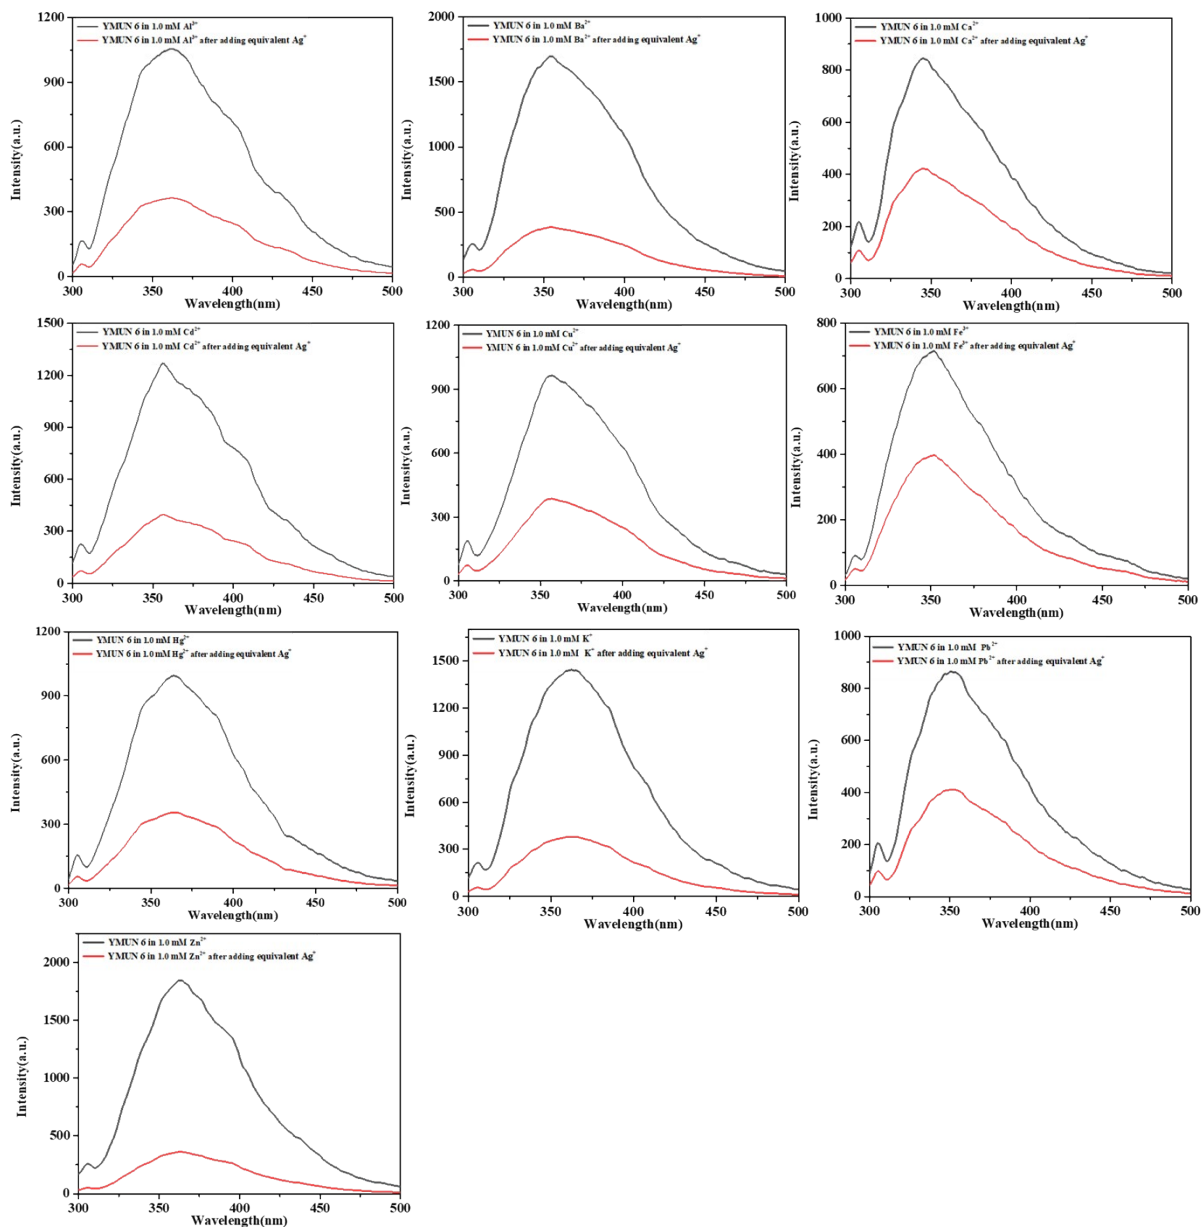

**Figure S17.** The fluorescence spectra of YMUN 6 in various metal ions (1.0 mM) (Black lines), and adding equivalent  $\text{Ag}^+$  in various metal ions solution.

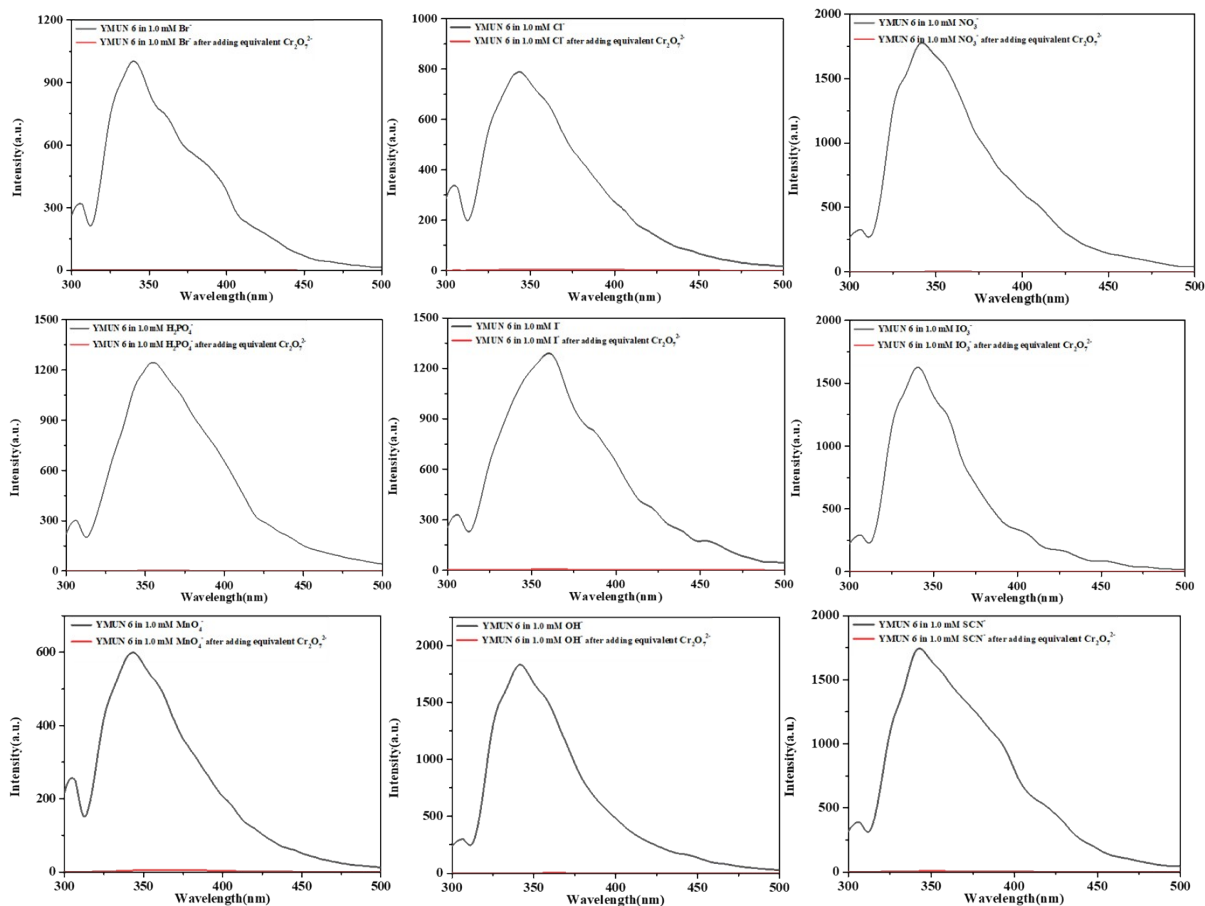

**Figure S18.** The fluorescence spectra of YMUN 6 in various anions (1.0 mM) (Black lines), and adding equivalent  $\text{Cr}_2\text{O}_7^{2-}$  in various anions solution.

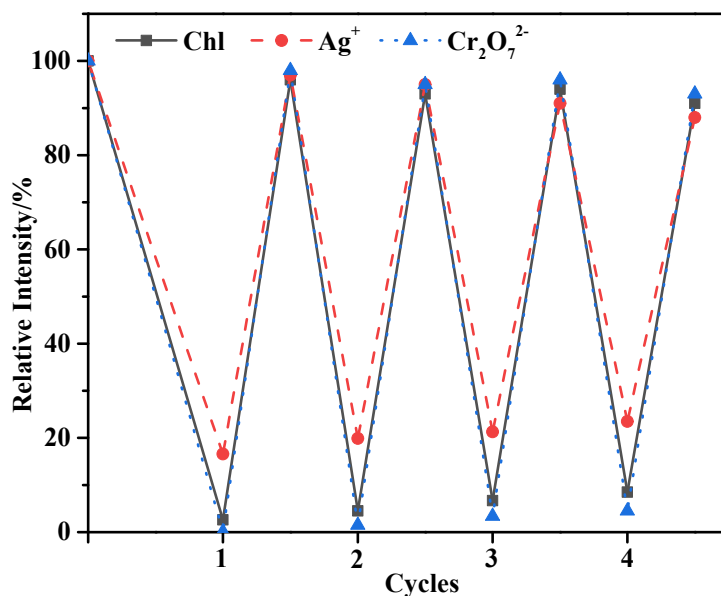

**Figure S19.** The recycling fluorescence intensity of YMUN 6 for Chl antibiotic,  $\text{Ag}^+$  ion, and  $\text{Cr}_2\text{O}_7^{2-}$  ion, respectively, after four times.

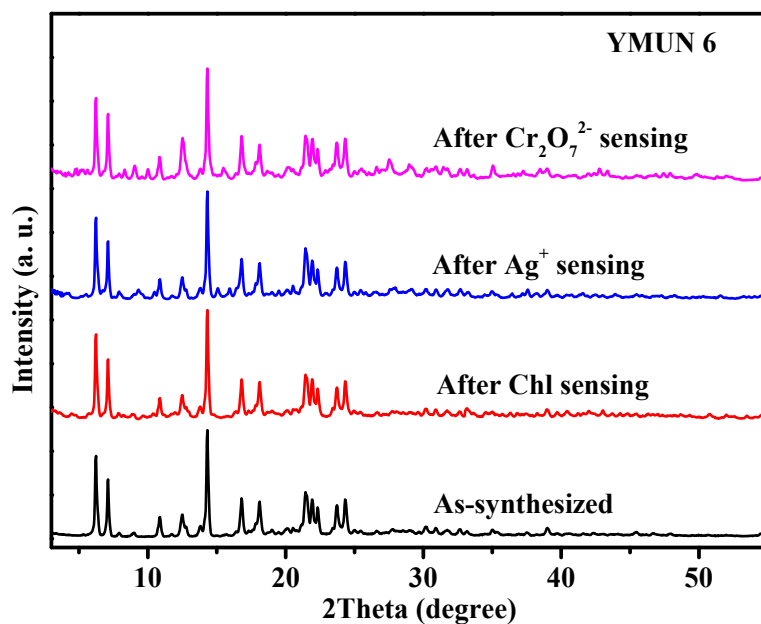

**Figure S20.** The comparison of PXR patterns for YMUN 6 after Chl antibiotic, Ag<sup>+</sup>, Cr<sub>2</sub>O<sub>7</sub><sup>2-</sup> ions sensing.

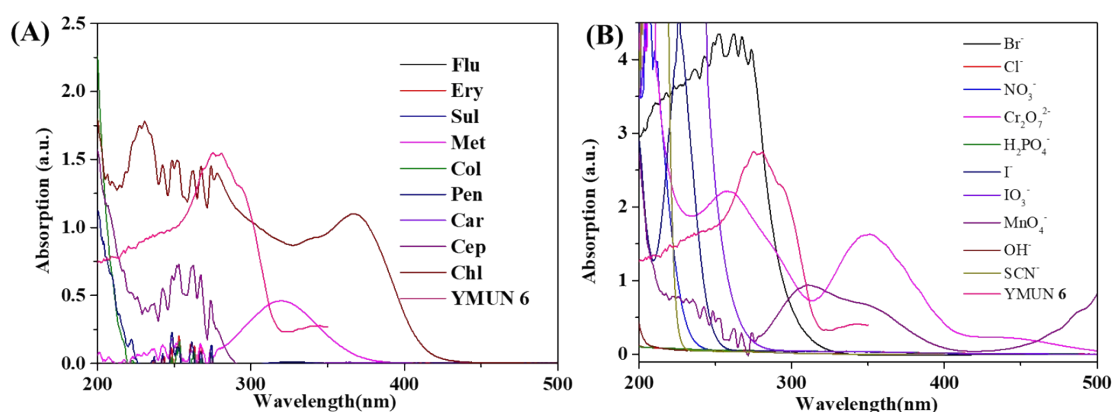

**Figure S21.** The UV-vis spectra of Chl antibiotic/Cr<sub>2</sub>O<sub>7</sub><sup>2-</sup> ion in aqueous solutions and the excitation spectrum of YMUN 6.

**Table S1** Selected bond lengths (Å) and angles (°) for YMUN 6–8.

| YMUN 6                  |             |                                         |             |
|-------------------------|-------------|-----------------------------------------|-------------|
| Zn1—O2                  | 1.968 (2)   | Zn2—O8 <sup>iii</sup>                   | 1.956 (2)   |
| Zn1—O6 <sup>i</sup>     | 1.956 (2)   | Zn2—O11                                 | 1.931 (2)   |
| Zn1—N4 <sup>ii</sup>    | 2.022 (3)   | Zn2—N8 <sup>iv</sup>                    | 2.033 (3)   |
| Zn1—N1                  | 2.004 (3)   | Zn2—N5                                  | 2.023 (3)   |
| O2—Zn1—N4 <sup>ii</sup> | 91.51 (11)  | O6 <sup>i</sup> —Zn1—N1                 | 98.39 (11)  |
| O2—Zn1—N1               | 107.74 (11) | N1—Zn1—N4 <sup>ii</sup>                 | 124.10 (12) |
| O6 <sup>i</sup> —Zn1—O2 | 117.63 (10) | O8 <sup>iii</sup> —Zn2—N8 <sup>iv</sup> | 115.24 (11) |

|                                       |             |                           |            |
|---------------------------------------|-------------|---------------------------|------------|
| O6 <sup>i</sup> —Zn1—N4 <sup>ii</sup> | 118.40 (11) | O8 <sup>iii</sup> —Zn2—N5 | 91.15 (11) |
| O11—Zn2—O8 <sup>iii</sup>             | 122.29 (11) | C1—O2—Zn1                 | 120.1 (2)  |
| O11—Zn2—N8 <sup>iv</sup>              | 95.87 (11)  | C47—O8—Zn2 <sup>iii</sup> | 115.4 (2)  |
| O11—Zn2—N5                            | 114.58 (11) | C66—O11—Zn2               | 122.4 (2)  |
| N5—Zn2—N8 <sup>iv</sup>               | 119.90 (12) | C20—O6—Zn1 <sup>i</sup>   | 113.9 (2)  |
| C87—N8—Zn2 <sup>ii</sup>              | 135.7 (2)   | C46—N4—Zn1 <sup>iv</sup>  | 133.8 (2)  |
| C86—N8—Zn2 <sup>ii</sup>              | 117.6 (2)   | C40—N4—Zn1 <sup>iv</sup>  | 118.9 (2)  |
| C21—N1—Zn1                            | 137.2 (2)   | C67—N5—Zn2                | 117.6 (2)  |
| C27—N1—Zn1                            | 116.9 (2)   | C68—N5—Zn2                | 130.2 (2)  |

Symmetry codes: (i)  $-x, -y, -z$ ; (ii)  $x, y-1, z-1$ ; (iii)  $-x+1, -y+1, -z+1$ ; (iv)  $x, y+1, z+1$ .

---

#### YMUN 7

---

|                                        |             |                                         |             |
|----------------------------------------|-------------|-----------------------------------------|-------------|
| Zn2—O5 <sup>i</sup>                    | 1.977 (2)   | Zn1—O1 <sup>iv</sup>                    | 1.961 (2)   |
| Zn2—O5                                 | 1.977 (2)   | Zn1—O1                                  | 1.961 (2)   |
| Zn2—N4 <sup>ii</sup>                   | 2.026 (2)   | Zn1—N1 <sup>iv</sup>                    | 2.012 (3)   |
| Zn2—N4 <sup>iii</sup>                  | 2.026 (2)   | Zn1—N1                                  | 2.012 (3)   |
| O5 <sup>i</sup> —Zn2—O5                | 115.21 (14) | N4 <sup>ii</sup> —Zn2—N4 <sup>iii</sup> | 108.02 (14) |
| O5 <sup>i</sup> —Zn2—N4 <sup>iii</sup> | 118.02 (10) | O1 <sup>iv</sup> —Zn1—O1                | 119.21 (14) |
| O5 <sup>i</sup> —Zn2—N4 <sup>ii</sup>  | 99.20 (9)   | O1 <sup>iv</sup> —Zn1—N1 <sup>iv</sup>  | 102.48 (10) |
| O5—Zn2—N4 <sup>ii</sup>                | 118.02 (10) | O1—Zn1—N1 <sup>iv</sup>                 | 108.57 (10) |
| O5—Zn2—N4 <sup>iii</sup>               | 99.20 (9)   | O1 <sup>iv</sup> —Zn1—N1                | 108.57 (10) |
| O1—Zn1—N1                              | 102.48 (10) | N1 <sup>iv</sup> —Zn1—N1                | 116.23 (15) |
| N1 <sup>iv</sup> —Zn1—N1               | 116.23 (15) | C21—O5—Zn2                              | 110.49 (19) |
| C21—O5—Zn2                             | 110.49 (19) | C1—O1—Zn1                               | 112.8 (2)   |
| O1—Zn1—N1                              | 102.48 (10) | C35—N4—Zn2 <sup>v</sup>                 | 129.1 (2)   |
| C24—N1—Zn1                             | 132.5 (2)   | C22—N1—Zn1                              | 121.6 (2)   |

Symmetry codes: (i)  $-x+1, y, -z+3/2$ ; (ii)  $-x+1, y-3, -z+3/2$ ; (iii)  $x, y-3, z$ ; (iv)  $-x+2, y, -z+3/2$ ; (v)  $x, y+3, z$ .

---

#### YMUN 8

---

|                        |             |                                       |            |
|------------------------|-------------|---------------------------------------|------------|
| Zn1—O3                 | 1.952 (2)   | Zn1—N1                                | 2.030 (3)  |
| Zn1—O7 <sup>i</sup>    | 1.974 (2)   | Zn1—N4 <sup>ii</sup>                  | 2.048 (3)  |
| O3—Zn1—O7 <sup>i</sup> | 113.32 (11) | O7 <sup>i</sup> —Zn1—N1               | 95.75 (11) |
| O3—Zn1—N1              | 137.25 (12) | O7 <sup>i</sup> —Zn1—N4 <sup>ii</sup> | 93.57 (11) |

|                           |             |                           |             |
|---------------------------|-------------|---------------------------|-------------|
| O3—Zn1—N4 <sup>ii</sup>   | 106.48 (11) | N1—Zn1—N4 <sup>ii</sup>   | 101.99 (12) |
| C19—O3—Zn1                | 104.9 (2)   | C1—N1—Zn1                 | 117.6 (3)   |
| C38—O7—Zn1 <sup>i</sup>   | 120.6 (2)   | C2—N1—Zn1                 | 136.4 (2)   |
| C18—N4—Zn1 <sup>iii</sup> | 122.2 (2)   | C17—N4—Zn1 <sup>iii</sup> | 132.6 (3)   |

Symmetry codes: (i)  $-x+2, -y+2, -z+1$ ; (ii)  $x+1/2, -y+1/2, z+1/2$ ; (iii)  $x-1/2, -y+1/2, z-1/2$ .

**Table S2** Hydrogen bond distances (Å) and angles (°) of **YMUN 6–8**

| D-H···A       | d(D-H) | d(H···A) | d(D···A) | ∠DHA |
|---------------|--------|----------|----------|------|
| <b>YMUN 6</b> |        |          |          |      |
| C18-H18···O7  | 0.95   | 2.54     | 3.441(4) | 159  |
| C25-H25···O12 | 0.95   | 2.27     | 3.080(5) | 143  |
| C27-H27···O7  | 0.95   | 2.32     | 3.149(4) | 145  |
| C42-H42···O10 | 0.95   | 2.33     | 3.141(5) | 143  |
| C45-H45···O5  | 0.95   | 2.54     | 2.932(6) | 105  |
| C70-H70···O4  | 0.95   | 2.37     | 3.308(5) | 171  |
| C82-H82···O6  | 0.95   | 2.46     | 3.099(5) | 124  |
| C86-H86···O1  | 0.95   | 2.33     | 3.134(4) | 142  |
| C86-H86···O7  | 0.95   | 2.49     | 3.113(5) | 123  |
| <b>YMUN 7</b> |        |          |          |      |
| C25-H25A···O2 | 0.99   | 2.47     | 3.061(4) | 117  |
| C32-H32B···O6 | 0.99   | 2.53     | 3.009(4) | 109  |
| <b>YMUN 8</b> |        |          |          |      |
| C1-H1···O6    | 0.95   | 2.43     | 3.226(5) | 141  |
| C13-H13···O6  | 0.95   | 2.20     | 3.153(4) | 178  |
